# Supplementary material for: Circular RNA circREPS2 Acts as a Sponge of miR-558 to Suppress Gastric Cancer Progression by Regulating RUNX3/β-catenin Signaling
Source: PubMed Central journal article supplement (PMC7390859; doi:10.1016/j.omtn.2020.06.026), 2020-06-27
Supplement: mmc1.pdf [file mmc1.pdf]

OMTN, Volume 21

## **Supplemental Information**

### **Circular RNA circREPS2 Acts as a Sponge of miR-558 to Suppress Gastric Cancer Progression by Regulating RUNX3/ $\beta$ -catenin Signaling**

**Xiong Guo, Xinglong Dai, Jianjun Liu, Anqi Cheng, Chuan Qin, and Ziwei Wang**

**Supplementary table S1** Primers and oligonucleotide sequences used in this study

| <b>List of oligonucleotide sequences</b> | <b>5'--&gt; 3'</b>               |
|------------------------------------------|----------------------------------|
| <b>Primers for PCR</b>                   |                                  |
| GAPDH Forward                            | CAATGACCCCTTCATTGACC             |
| GAPDH Reverse                            | TTGATTTTGGAGGGATCTCG             |
| CircREPS2 Forward                        | TGGTTCAAGTGACACTACCA             |
| CircREPS2 Reverse                        | TTGCTGGACTACTTTCTGCA             |
| REPS2 Forward                            | CAGTCTCCCACGATGTCACC             |
| REPS2 Reverse                            | TTGTTGATTTGCCGGCAGTG             |
| RUNX3 Forward                            | AGGCAATGACGAGAACTACTCC           |
| RUNX3 Reverse                            | CGAAGGTCGTTGAACCTGG              |
| U6 Forward                               | CTCGCTTCGCCAGCACA                |
| U6 Reverse                               | AACGCTTCACGAATTTGCGT             |
| <b>siRNAs</b>                            |                                  |
| si-NC                                    | GTGACAGATGGTTCAGTCCTA            |
| si-circREPS2                             | CACTGTGATGGTTCAGTCCTA            |
| <b>FISH probes</b>                       |                                  |
| circREPS2-cy3                            | CCTGACTTGGTAGTGTCACTTGAAC        |
| miR-558-FAM                              | ATTTTGGTACAGCAGCTCA              |
| <b>Biotinylated probes</b>               |                                  |
| biotin-NC                                | GTGTAACACGTCTATACGCCCA           |
| biotin-REPS2                             | CATGG TTCAAGTGACACTACCAAGTCAGGAT |
| biotin-NC mimics sense                   | UUCUCCGAACGUGUCACGUTT            |
| biotin-miR-558 mimics sense              | UGAGCUGCUGUACCAAAAU              |
| <b>miRNA mimics and inhibitors</b>       |                                  |
| mimics NC                                | UUCUCCGAACGUGUCACGUTT            |
| miR-558 mimics                           | UGAGCUGCUGUACCAAAAU              |
| Anti-miR-NC                              | UCUACUCUUUCUAGGAGGUUGUGA         |
| Anti-miR-558                             | AUUUUGGUACAGCAGCUCA              |
